# Supplementary material for: LSD1 mediates MYCN control of epithelial-mesenchymal transition through silencing of metastatic suppressor NDRG1 gene
Source: PubMed Central journal article supplement (PMC5354800; doi:10.18632/oncotarget.12924), 2016-11-22

## LSD1 mediates MYCN control of epithelial-mesenchymal transition through silencing of metastatic suppressor NDRG1 gene

### Supplementary Material

Table S1: oligos used in this work

|         | Gene                          | FW                     | Rev                    |
|---------|-------------------------------|------------------------|------------------------|
| qChIP   | NDRG1 (TSS)                   | CGGATGGTGAAGTACGA      | CCCGGACGTAAACAAACCT    |
| qChIP   | NDRG1 (-10Kb)                 | CCCATTGCTTTAAATCTGCTCT | TCAAAGCACTCTCTCGCTTTT  |
| qRT-PCR | NDRG1                         | GGGCTGAAAAGCATTATTGG   | CTCCACCATCTCAGGGTTGT   |
| qRT-PCR | Desmoplakin                   | GCTAAACGCCGCCAGGAT     | CCGCATGACTGTGTTGGAAT   |
| qRT-PCR | Vimentin                      | CCAGCCGCAGCCTCTACG     | GCGAGAAGTCCACCGAGTCC   |
| qRT-PCR | Occludin                      | GCCGGTTCCTGAAGTGGT     | CGAGGCTGCCTGAAGTCATC   |
| qRT-PCR | N-cadherin                    | CTGTGGGAATCCGACGAATGG  | GTCATTGTCAGCCGCTTTAAGG |
| qRT-PCR | E-cadherin                    | CCGCTGGCGTCTGTAGGAAGG  | GGCTCTTTGACCACCGCTCTCC |
| qRT-PCR | Smooth muscle $\alpha$ -actin | CACTGCCGCATCCTCATCCT   | TCATGATGCTGTTGTAGGTGGT |
| qRT-PCR | GUSb                          | GTGGGCATTGTGCTACCTC    | ATTTTTGTCCCGGCGAAC     |

Table S2: antibodies used in this work

| Protein           | Used for        | Manufacturer           |
|-------------------|-----------------|------------------------|
| Actinin           | WB              | sc-17829, Santa Cruz   |
| NDRG1             | WB              | ab37897, Abcam         |
| P-NDRG1 (Thr 346) | WB              | #3217, Cell Signaling  |
| LSD1              | ChIP, co-IP, WB | ab17721, Abcam         |
| MYCN              | ChIP, co-IP, WB | sc-53993, Santa Cruz   |
| H3Ac              | ChIP            | 06-599, Millipore      |
| H3K27me3          | ChIP            | 07-449, Millipore      |
| $\beta$ -Catenin  | WB, IF          | 610153, BD Biosciences |
| CyclinD1          | WB              | sc-8396, Santa Cruz    |
| $\alpha$ -Tubulin | WB              | T5168, Sigma-aldrich   |
| RCOR1             | WB              | #07-455, Upstate       |
| Max               | WB              | sc-197, Santa Cruz     |

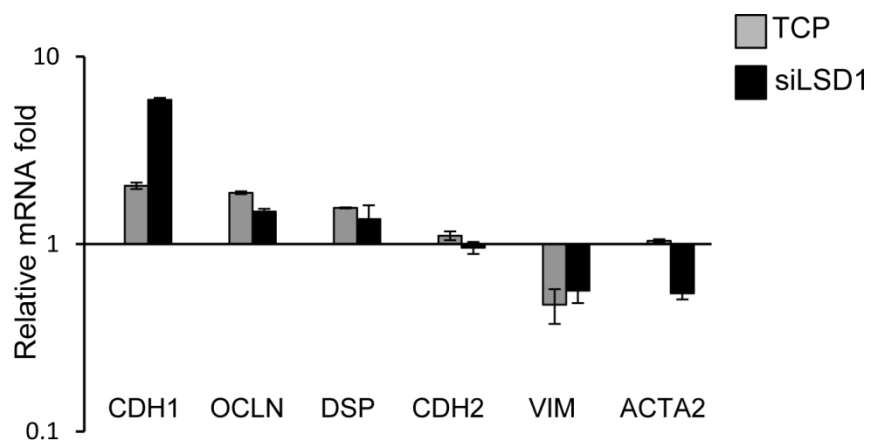

Supplementary Fig 1. EMT markers mRNAs expression analysis after TCP treatment and LSD1-KD of Tet-21/N cells through quantitative RT-PCR. Expression profiles were normalized against control cells. Data represent the mean  $\pm$  SD of three independent experiments. Changes in mRNA expression are all statistically significant ( $p < 0,05$ ; Student t test).

Fig. 1D

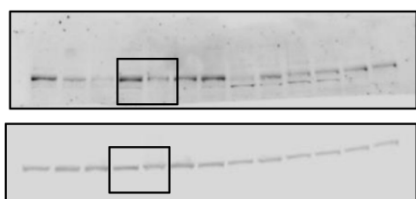

Fig. 1E

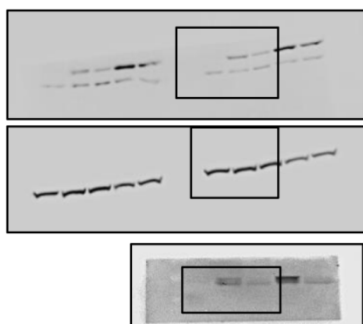

Fig. 1F

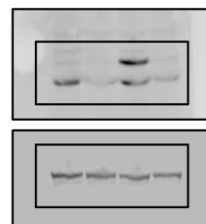

Fig. 1G

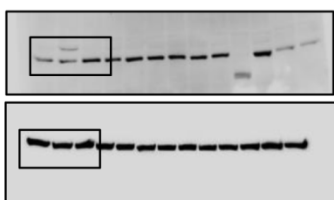

Fig. 3A

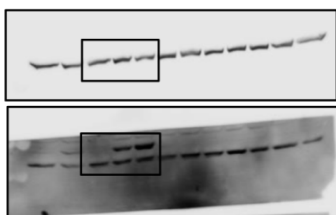

Fig. 3B

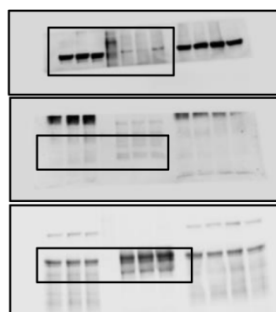

Fig. 3C

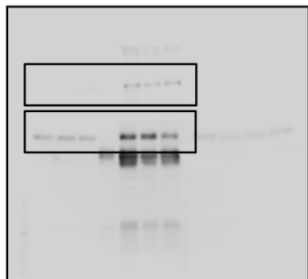

Fig. 3D

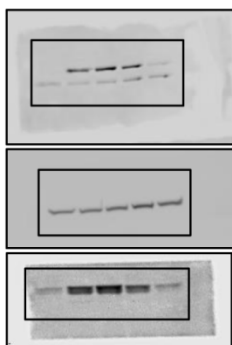

Fig. 3E

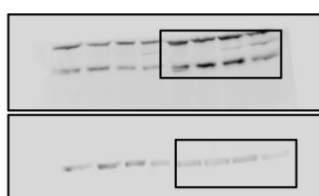

Fig. 3F

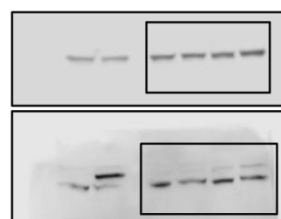

Fig. 4B

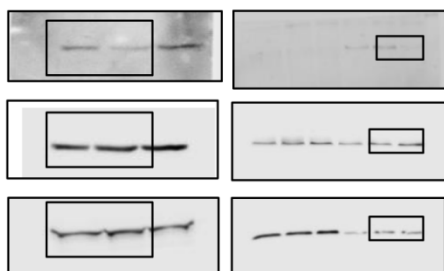

Fig. 5B

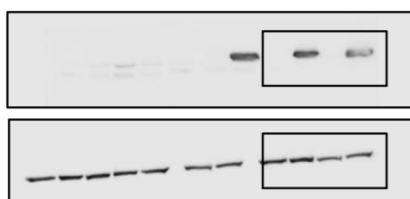

Fig. 7A

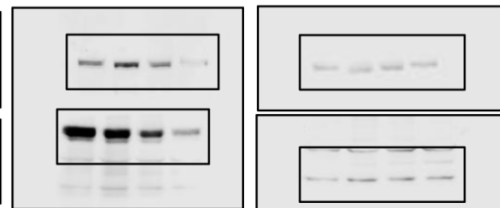

Supplement: oncotarget-08-3854-s001.pdf [file oncotarget-08-3854-s001.pdf]
